# Supplementary material
Source: PubMed Central journal article supplement (PMC6748655)
Supplement: NIHMS1529796-supplement-1.pdf [file NIHMS1529796-supplement-1.pdf]

|      | H3 HK-68 | gHA <sup>cRBS</sup> | gHA <sup>RBS</sup> | H1 SI-06 |
|------|----------|---------------------|--------------------|----------|
| HC19 | +++      | ~300-fold*          | ~4-fold            | -        |
| HC45 | +++      | ~300-fold           | >1,000-fold        | -        |
| FI6  | +++      | ~200-fold           | ~150-fold          | +++      |
| CH67 | -        | -                   | -                  | +++      |

**Figure S1. Loss of reactivity to diagnostic antibodies by glycan addition. Related to Figure 1.** Antibodies, HC19 (RBS-directed), HC45 (vestigial esterase domain-directed) and FI6 (stem-directed) were assayed for binding to wildtype H3 HK-68, gHA<sup>cRBS</sup>, gHA<sup>RBS</sup> using a Luminex-based assay. +++ indicates strong binding and loss of antibody binding is reported as a fold change in MFI in reference to H3 HK-68. (-) indicates no binding. H1 SI-06 and CH67 (RBS-directed antibody) was used as additional controls.

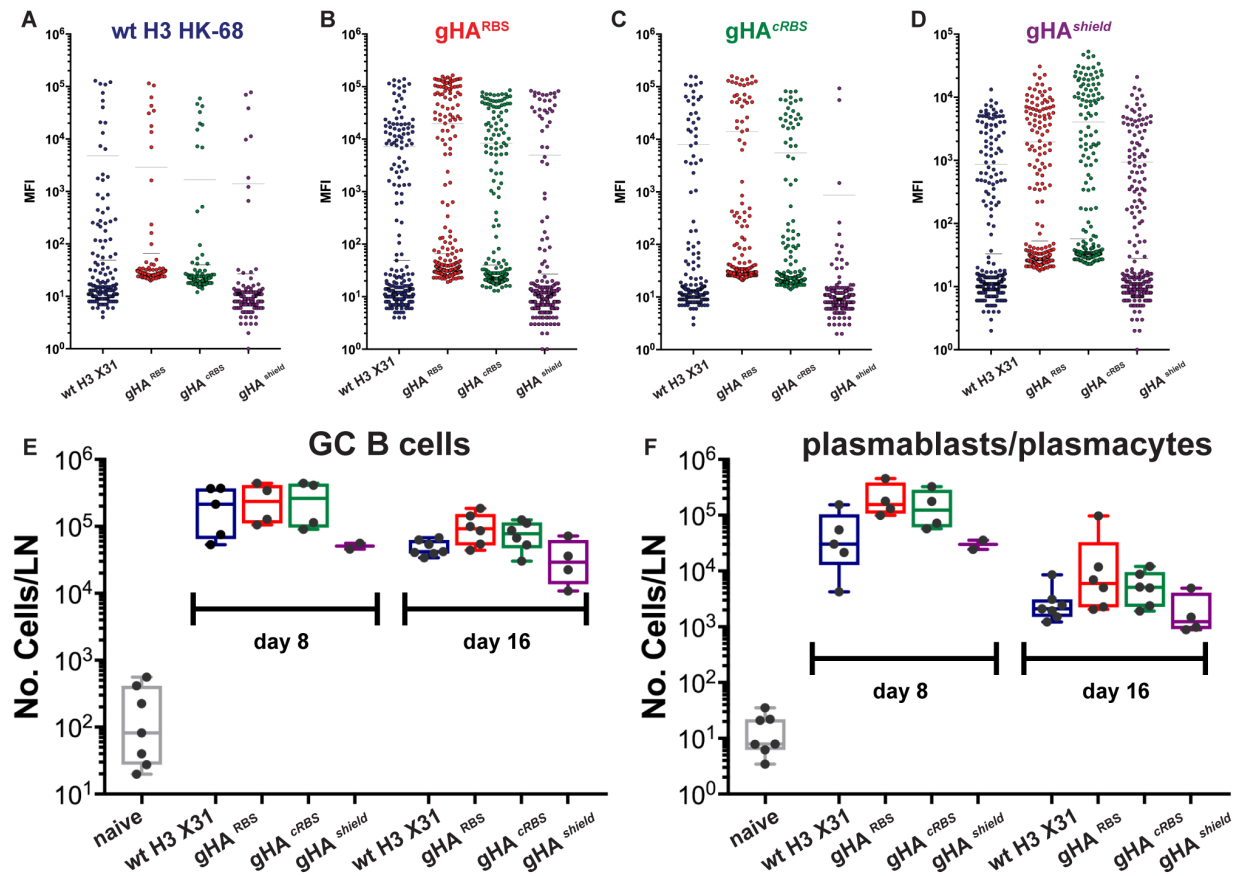

**Figure S2. Germinal center and plasma cell responses are unaffected by HA glycosylation. Related to Figure 2.** (A-D) Single GC B cells were sorted from the popliteal lymph nodes of immunized B6 mice and cultured with NB-21.2D9 feeder cells. Individual single-cell culture supernatants from mice immunized with (A) wt H3 HK-68 (blue), (B) gHA<sup>RBS</sup> (red), (C) gHA<sup>cRBS</sup> (green), and (D) gHA<sup>shield</sup> (purple) were harvested and screened for binding in a Luminex-based assay. (E-F) Popliteal lymph nodes from mice immunized with wt H3 HK-68 (blue), gHA<sup>RBS</sup> (red), gHA<sup>cRBS</sup> (green), and gHA<sup>shield</sup> (purple) were harvested 8 or 16 days post-immunization and the number of (E) GC B cells (GL-7<sup>+</sup>B220<sup>hi</sup>CD38<sup>lo</sup>IgD<sup>-</sup>CD93<sup>-</sup>CD138<sup>-</sup>) and (F) plasmablasts/-cytes (B220<sup>lo</sup>CD138<sup>hi</sup>) quantified. Naïve mice (n=7) and H3 H3X31 (n=5, 7), gHA<sup>RBS</sup> (n=4, 6), gHA<sup>cRBS</sup> (n=4, 6) and gHA<sup>shield</sup> (n=2, 4); n = number of mice used for day 8, 16 analyses, respectively. Each circle in E-F represents one lymph node (LN) per mouse.

**A**

| mAb     | V <sub>H</sub> gene | CDR H3 Sequence  | wt HK-68 | gHA <sup>cRBS</sup> | gHA <sup>shield</sup> |
|---------|---------------------|------------------|----------|---------------------|-----------------------|
| FL-1146 | IGHV1-9             | CARSFQATSFAMDYW  |          |                     |                       |
| FL-1151 | IGHV1-9             | CARSFQATSFAMDYW  |          |                     |                       |
| FL-1134 | IGHV1-9             | CARSFQATSYAMDYW  |          |                     |                       |
| FL-1136 | IGHV1-9             | CARSFQATSFAMDYW  |          |                     |                       |
| FL-1144 | IGHV1-9             | CSRSFQATSFAMDYW  |          |                     |                       |
| FL-1137 | IGHV1-9             | CTRSFQATSFAMDYW  |          |                     |                       |
| FL-1141 | IGHV1-9             | CARSFQATSFAMDYW  |          |                     |                       |
| FL-1152 | IGHV1-9             | CSRSFQATSFAMDYW  |          |                     |                       |
| FL-1132 | IGHV1-9             | CARSFQATSFAMDYW  |          |                     |                       |
| FL-982  | IGHV1-9             | CARSHYGSSFAMDCW  |          |                     |                       |
| FL-1140 | IGHV1-9             | CARSFQATSFAMDYW  |          |                     |                       |
| FL-1138 | IGHV1-9             | CARSFQATSFAMDYW  |          |                     |                       |
| FL-1156 | IGHV1-9             | CARSFQATSFAMDYW  |          |                     |                       |
| FL-1153 | IGHV1-9             | CARSFQATSFAMDYW  |          |                     |                       |
| FL-993  | IGHV1-9             | CARSHYGCNFMADYW  |          |                     |                       |
| FL-1012 | IGHV1-9             | CARSHYGSSFAMDFW  |          |                     |                       |
| FL-1157 | IGHV1-9             | CARSFQATSFAMDYW  |          |                     |                       |
| FL-985  | IGHV1-9             | CARSHYDSSFAMDYW  |          |                     |                       |
| FL-1150 | IGHV1-9             | CARSFQATSFAMDYW  |          |                     |                       |
| FL-1149 | IGHV1-9             | CSRSFQATSFAMDYW  |          |                     |                       |
| FL-1025 | IGHV1-9             | CARSHYGSTTFMDYW  |          |                     |                       |
| FL-995  | IGHV1-9             | CARSHYGSSFAMDYW  |          |                     |                       |
| FL-1000 | IGHV1-9             | CARSHYGSTFAMDYW  |          |                     |                       |
| FL-977  | IGHV1-9             | CARSHYGSCFAMDYW  |          |                     |                       |
| FL-1143 | IGHV1-9             | CARSGIPYFAMDYW   |          |                     |                       |
| FL-1147 | IGHV1-9             | CARSFQATSFAMDYW  |          |                     |                       |
| FL-1026 | IGHV1-9             | CARSHYGSTFAMDYW  |          |                     |                       |
| FL-1023 | IGHV1-9             | CARSHYGSSFAMDNDW |          |                     |                       |
| FL-979  | IGHV1-9             | CARSHYGSTFAMDYW  |          |                     |                       |
| FL-1007 | IGHV1-9             | CARSHYGSTFAMDYW  |          |                     |                       |
| FL-989  | IGHV1-9             | CARSHYGSSFAMDYW  |          |                     |                       |
| FL-1158 | IGHV1-9             | CARSPQSTSFAMDYW  |          |                     |                       |
| FL-1010 | IGHV1-9             | CARSHYGSTFAMDYW  |          |                     |                       |
| FL-984  | IGHV1-9             | CATSHYGSSFAMDCW  |          |                     |                       |
| FL-1155 | IGHV1-9             | CARSFQATSFALDYW  |          |                     |                       |
| FL-1016 | IGHV1-9             | CARSHYGCSFAMDYW  |          |                     |                       |
| FL-1002 | IGHV1-9             | CALWLHDLFDYW     |          |                     |                       |
| FL-1021 | IGHV1-9             | CARSHYGSSFAMDYW  |          |                     |                       |

**B**

| mAb     | V <sub>H</sub> gene | CDR H3 Sequence   | wt HK-68 | gHA <sup>RBS</sup> | gHA <sup>shield</sup> |
|---------|---------------------|-------------------|----------|--------------------|-----------------------|
| FL-1050 | IGHV5-9-1           | CTRDSDYYGSRVWFAYW |          |                    |                       |
| FL-1041 | IGHV5-9-1           | CTRVGDYDAWFAYW    |          |                    |                       |
| FL-1056 | IGHV5-9-1           | CTRVGEYDAWFAYW    |          |                    |                       |
| FL-1066 | IGHV5-9-1           | CTRDSDYYGSRVWFAYW |          |                    |                       |
| FL-1081 | IGHV5-9-1           | CTRVGDYDAWFAYW    |          |                    |                       |
| FL-1030 | IGHV1-69            | CARNYGSSYGYFDVW   |          |                    |                       |
| FL-1086 | IGHV1-69            | CARNYGSSYGYFDVW   |          |                    |                       |
| FL-1042 | IGHV1-69            | CARNYGSTYGYFDVW   |          |                    |                       |
| FL-1087 | IGHV1-69            | CARNYGSSYGYFDVW   |          |                    |                       |
| FL-1102 | IGHV1-69            | CARNYGSTYGYFDVW   |          |                    |                       |
| FL-1035 | IGHV1-69            | CARNYGSSYGYFDVW   |          |                    |                       |
| FL-1065 | IGHV1-69            | CTRNYGSSYGYFDVW   |          |                    |                       |
| FL-1098 | IGHV1-69            | CARNYGSTYGYFDVW   |          |                    |                       |
| FL-1058 | IGHV1-69            | CARNYGSSYGYFDVW   |          |                    |                       |
| FL-1060 | IGHV1-69            | CARNYGSTYGYFDVW   |          |                    |                       |
| FL-1039 | IGHV1-69            | CARNYGSTYGYFDVW   |          |                    |                       |
| FL-1034 | IGHV1-69            | CARNYGSSYGYFDVW   |          |                    |                       |
| FL-1029 | IGHV1-69            | CARNYGSSYGYFDVW   |          |                    |                       |
| FL-1036 | IGHV1-69            | CARNYGSSYGYFDVW   |          |                    |                       |
| FL-1040 | IGHV1-69            | CVRNYGSTYGYFDVW   |          |                    |                       |
| FL-1071 | IGHV1-69            | CARNYGSSYGYFDVW   |          |                    |                       |
| FL-1093 | IGHV1-69            | CARNYGSSYGYFDVW   |          |                    |                       |
| FL-1037 | IGHV1-69            | CARNYGSSYGYFDVW   |          |                    |                       |
| FL-1073 | IGHV1-69            | CARNYGSSYGYFDVW   |          |                    |                       |
| FL-1072 | IGHV1-69            | CARNYGSSYGYFDVW   |          |                    |                       |
| FL-1103 | IGHV1-69            | CARNFGSAYGYFDVW   |          |                    |                       |
| FL-1052 | IGHV1-69            | CARNYGSSYGYFDVW   |          |                    |                       |
| FL-1092 | IGHV1-69            | CARNYGTSYGYFDVW   |          |                    |                       |
| FL-1099 | IGHV1-69            | CARNYGSTYGYFDVW   |          |                    |                       |
| FL-1076 | IGHV1-69            | CARNYGSTYGYFDVW   |          |                    |                       |

| MFI              |
|------------------|
| > 100,001        |
| 10,001 - 100,000 |
| 1,001 - 10,000   |
| 101-1,000        |
| < Threshold      |

**Figure S3. Single-cell cultures reveal differences in binding of B cells elicited by gHAs. Related to Figure 3.** Antibodies from (A) gHA<sup>cRBS</sup> and (B) gHA<sup>RBS</sup> immunizations were tested for reactivity to wildtype HA, gHA<sup>cRBS</sup> or gHA<sup>RBS</sup> and gHA<sup>shield</sup> using a Luminex-based assay. A heat map for reactivity is shown based on MFI. The CDR H3 sequences are listed.

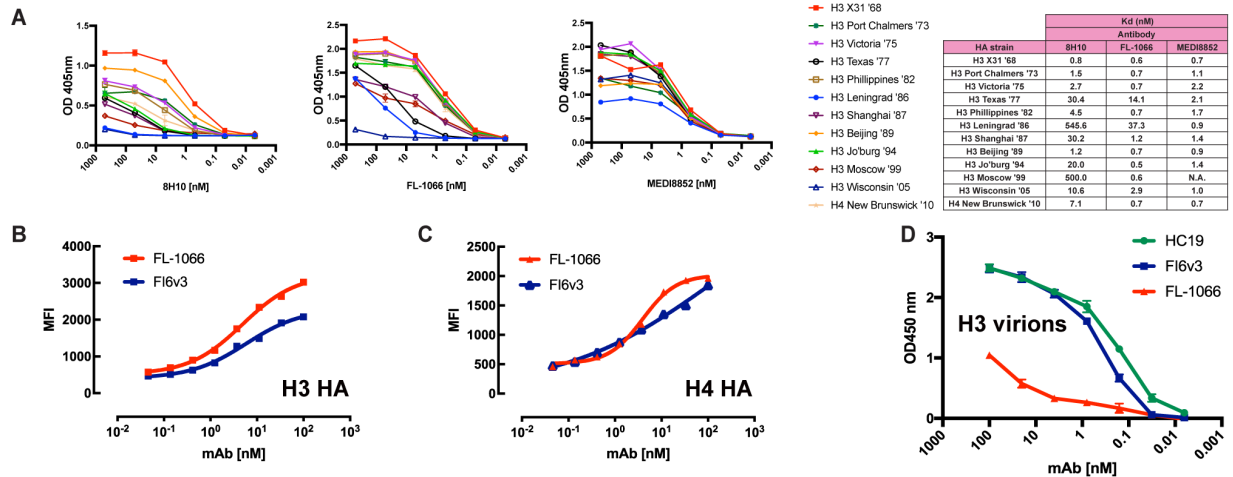

**Figure S4. Reactivity of  $V_H$ -restricted antibodies and breadth of a  $V_H$ 5-9-1 antibody. Related to Figure 4 and STAR Methods.** (A) Reactivity of 8H10 (left), FL-1066 (middle) and MEDI8852 (right) to a panel of historical H3 influenza HAs as measured by ELISA. Estimated affinity dissociation constants ( $K_d$ ) for each HA are reported. (B-C) Binding of FL-1066 and FI6v3 mAbs to cell surface-expressed (B) H3 Aichi 1968 (X31) and (C) wildtype H4 New Brunswick 2010. (D) Binding of FL-1066, HC19 and FI6v3 mAbs to intact H3N2 Aichi 1968 (X31) virions as measured by ELISA. (Error bars represent the standard deviation of the mean and calculated in GraphPad Prism.)

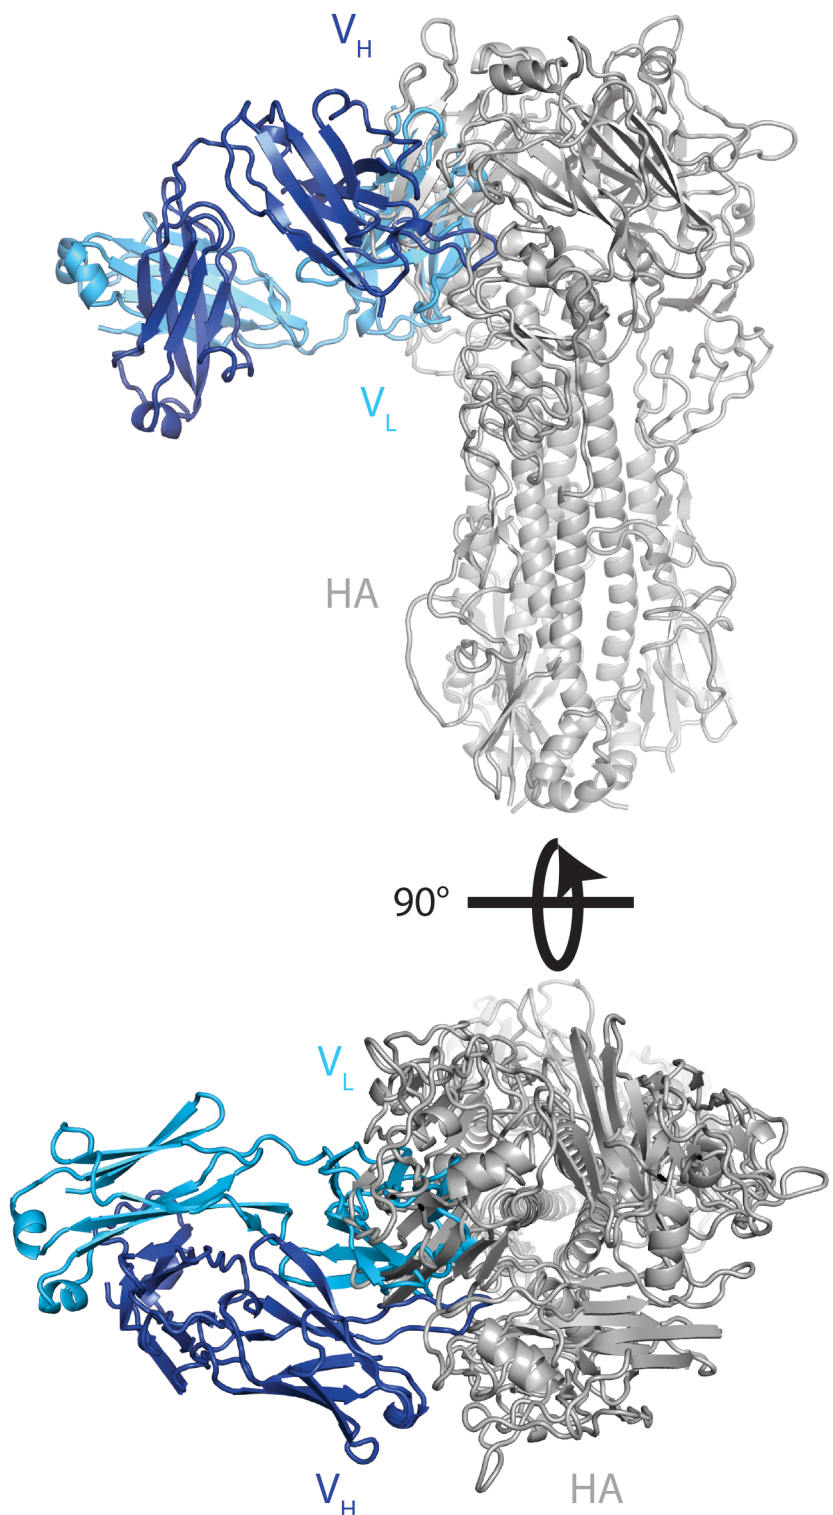

**Figure S5. Structural superposition of a V<sub>n</sub> 5-9-1 Fab complex illustrates the occluded nature of the HA epitope. Related to Figure 5.** Crystal structure of the 8H10 Fab complex (this study) was superposed to the H3 HK-68 HA trimer (PDB ID 1HA0).

| Crystal                                   | 8H10-complex                     | FL-1056-complex                  | FL-1066-complex                  |
|-------------------------------------------|----------------------------------|----------------------------------|----------------------------------|
| Wavelength (Å)                            | 0.978                            | 0.978                            | 0.978                            |
| Resolution range (Å)                      | 46.12 - 3.5 (3.625 - 3.5)        | 44.37 - 3.0 (3.107 - 3.0)        | 44.33 - 3.0 (3.108 - 3.0)        |
| Space group                               | P 3 <sub>1</sub> 2 1             | P 3 <sub>1</sub>                 | P 3 <sub>1</sub>                 |
| Unit cell (Å)<br>(°)                      | 124.00 124.00 90.09<br>90 90 120 | 153.19 153.19 94.16<br>90 90 120 | 153.56 153.56 91.81<br>90 90 120 |
| Multiplicity                              | 5.2 (4.9)                        | 6.4 (6.5)                        | 6.4 (6.5)                        |
| Completeness (%)                          | 98.47 (99.12)                    | 99.97 (99.98)                    | 99.80 (99.61)                    |
| Mean I/sigma(I)                           | 6.1 (1.32)                       | 9.29 (1.45)                      | 7.37 (1.02)                      |
| Wilson B-factor                           | 114.6                            | 51.9                             | 55.7                             |
| R <sub>int</sub>                          | 0.174 (1.2)                      | 0.284 (1.68)                     | 0.349 (2.50)                     |
| Reflections used in refinement            | 10239 (1018)                     | 49440 (4948)                     | 48387 (4876)                     |
| Reflections used for R <sub>int</sub>     | 540                              | 2396                             | 2303                             |
| R <sub>int</sub> /R <sub>int</sub>        | 0.23/0.28                        | 0.204/0.24                       | 0.25/0.28                        |
| Number of atoms                           | 5043                             | 16356                            | 16381                            |
| Protein residues                          | 654                              | 2148                             | 2143                             |
| RMS bonds(Å)/angles(°)                    | 0.01/1.19                        | 0.006/1.00                       | 0.01/1.37                        |
| Ramachandran favored/allowed/outliers (%) | 93.4/6/0.6                       | 92/8/0                           | 92.5/7/0.5                       |
| Clashscore                                | 19.46                            | 13.41                            | 28.5                             |
| Average B-factor                          | 134.99                           | 55.30                            | 55.3                             |
| macromolecules                            | 134.95                           | 55.30                            | 52.2                             |
| ligands                                   | 151.37                           |                                  | 65.6                             |

Statistics for the highest-resolution shell are shown in parentheses.

**Table S1. Crystallographic data and refinement statistics. Related to Figure 5.**
